# Supplementary material for: Spectroelectrochemical studies of the redox active tris[4-(triazol-1-yl)phenyl]amine linker and redox state manipulation of Mn(ii)/Cu(ii) coordination frameworks
Source: Royal Society of Chemistry journal article supplement (doi:10.1039/c9dt01729a), 2019-01-01
Supplement: c9dt01729a1.pdf [file c9dt01729a1.pdf]

## Supporting Information

### **Spectroelectrochemical studies of the redox active tris[4-(triazol-1-yl)phenyl]amine linker and redox state manipulation of Mn(II)/Cu(II) coordination frameworks**

Chin-May Ngue,<sup>a,b</sup> Yen-Hsiang Liu,<sup>c</sup> Yuh-Sheng Wen,<sup>a</sup> Man-Kit Leung,<sup>\*b,d</sup> Ching-Wen Chiu,<sup>\*b</sup>  
Kuang-Lieh Lu<sup>\*a</sup>

<sup>a</sup>Institute of Chemistry, Academia Sinica, Taipei 115, Taiwan

<sup>b</sup>Department of Chemistry, National Taiwan University, Taipei 106, Taiwan

<sup>c</sup>Department of Chemistry, Fu Jen Catholic University, New Taipei City 242, Taiwan

<sup>d</sup>Department of Chemistry, Advanced Research Centre for Green Materials Science and Technology, National Taiwan University, Taipei 106, Taiwan

### **Solid state *in situ* spectroelectrochemical (UV/Vis/NIR) method**

2 to 3 mg of **1** and **2** were lightly ground using a mortar and pestle, respectively. Indium tin oxide (ITO) glass (6 cm x 0.9 cm) was pretreated by washing with ethanol, acetone and purging with nitrogen. **1** and **2** were coated on the ITO glass, by spreading evenly with a spatula. Nafion in the propionitrile solution was carefully layered on top of the solid to serve as a binder. The electrochemical set up employed a three-electrode system with ITO as the working electrode, Pt mesh as the counter electrode and Ag/Ag<sup>+</sup> as the reference electrode in a 0.1 M *n*-Bu<sub>4</sub>NPF<sub>6</sub> propionitrile electrolyte. The three electrochemical cell was placed inside a 1 cm quartz cell, with the coated ITO sample and Pt mesh facing opposite in the cell. To minimize the risk of short-circuits, the compartment was separated by a tailor-made Teflon block. The electrolyte solution served as a baseline. A blank ITO glass was measured as the background value. Samples were scanned continuously with incremental potentials using a Hokuto Denko potentiostat until a change in the spectrum was observed. The spectral was measured by means of a JASCO V-570 UV-Vis-NIR spectrometer.

### ***Ex situ* chemical oxidation of **1****

**Oxidation by bromine.** Solid crystals of **1** was placed inside a small vial. The vial was then placed in a beaker containing 3 to 5 drops of bromine with a watch glass on top. Bromine vapour was allowed to diffuse into framework for 30 minutes. Solid **1** changed to orange colour.

**Oxidation by iodine.** 10 mg of **1** was prepared inside a 2 mL glass vial. The 2 mL glass vial was then transferred to a 20 mL glass vial with iodine crystals inside. Iodine vapour were allowed to slowly diffuse into the framework. Solid **1** changed to dark brown colour.

**Oxidation by Ce(IV).** Ceric ammonium nitrate was dissolved in water. A few drops of Ce(IV) were transferred to a glass vial containing solid **1**, Ce(IV) was added until the crystals changed to blue colour.

### **Computation calculation**

Geometry was optimized at B3LYP-D3/def2-TZVP. To speed up the calculation, the RICOSX approximation and def2/J auxiliary basis set were used. At the minimum geometry, a TD-DFT calculation at B3LYP-D3/def2-TZVP was performed to predict the electronic spectrum. All calculations were done using the ORCA 4.1.0 suite of programs.<sup>1</sup>

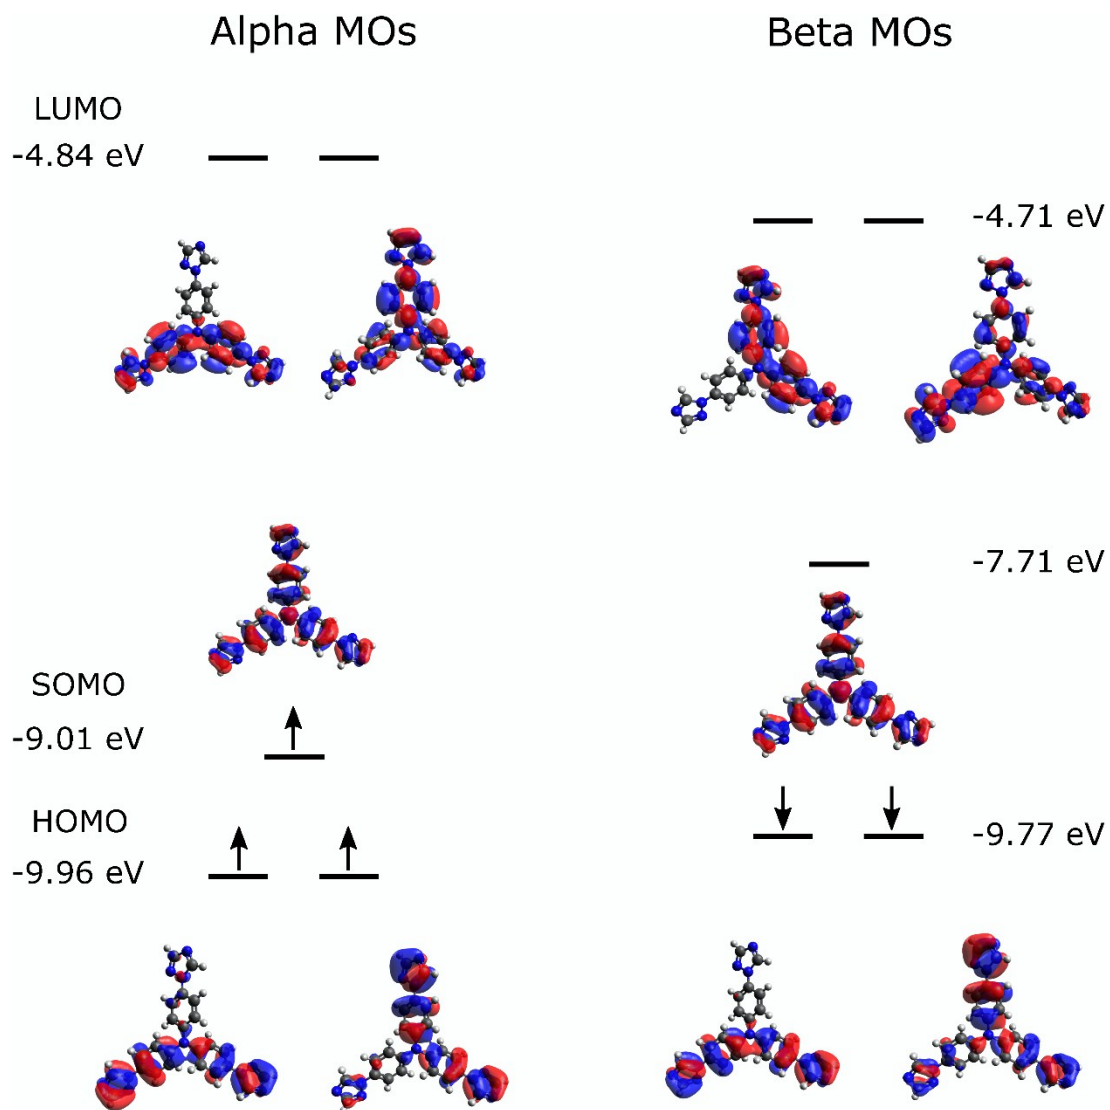

Schematic diagram S1. Unrestricted molecular orbital diagram of TTPA ligand in radical cation state.

**Table S1.** Crystal data and structure refinement for [MnCl<sub>2</sub>(TPA)(DMF)]<sub>n</sub> (**1**).

|                                              |                                                                     |
|----------------------------------------------|---------------------------------------------------------------------|
| Empirical formula                            | C <sub>27</sub> H <sub>25</sub> Cl <sub>2</sub> MnN <sub>11</sub> O |
| Formula weight                               | 645.42                                                              |
| Temperature, K                               | 100.0(2)                                                            |
| Wavelength, Å                                | 0.71073                                                             |
| Crystal system                               | Monoclinic                                                          |
| Space group                                  | C2/c                                                                |
| <i>a</i> , Å                                 | 18.2168(4)                                                          |
| <i>b</i> , Å                                 | 15.5104(3)                                                          |
| <i>c</i> , Å                                 | 21.1221(5)                                                          |
| β, °                                         | 98.252(2)                                                           |
| <i>V</i> , Å <sup>3</sup>                    | 5906.3(2)                                                           |
| <i>Z</i>                                     | 8                                                                   |
| Density (calculated), Mg/m <sup>3</sup>      | 1.452                                                               |
| Absorption coefficient, mm <sup>-1</sup>     | 0.671                                                               |
| <i>F</i> (000)                               | 2648                                                                |
| Crystal size, mm <sup>3</sup>                | 0.260 x 0.220 x 0.160                                               |
| Theta range for data collection, °           | 1.732 to 27.103                                                     |
| Index ranges                                 | -23 ≤ <i>h</i> ≤ 23, -19 ≤ <i>k</i> ≤ 19, -27 ≤ <i>l</i> ≤ 27       |
| Reflections collected                        | 76708                                                               |
| Independent reflections                      | 6527 [R(int) = 0.0559]                                              |
| Completeness to theta = 25.000°              | 100.0 %                                                             |
| Absorption correction                        | Semi-empirical from equivalents                                     |
| Refinement method                            | Full-matrix least-squares on <i>F</i> <sup>2</sup>                  |
| Data/restraints/parameters                   | 6527/0/381                                                          |
| Goodness-of-fit on <i>F</i> <sup>2</sup>     | 1.038                                                               |
| Final R indices [ <i>I</i> > 2σ( <i>I</i> )] | R1 = 0.0359, wR2 = 0.0852                                           |
| R indices (all data)                         | R1 = 0.0498, wR2 = 0.0946                                           |

---

$$R_1 = \sum ||F_o| - |F_c|| / \sum |F_o|; wR_2 = [\sum w(F_o^2 - F_c^2)^2 / \sum w(F_o^2)^2]^{1/2}$$

**Table S2.** Crystal data and structure refinement details for [CuCl<sub>2</sub>(TPA)·1.5DMF]<sub>n</sub> (**2**).

|                                              |                                                                                          |
|----------------------------------------------|------------------------------------------------------------------------------------------|
| Empirical formula                            | C <sub>28.5</sub> H <sub>28.5</sub> Cl <sub>2</sub> CuN <sub>11.5</sub> O <sub>1.5</sub> |
| <i>F</i> <sub>w</sub>                        | 690.64                                                                                   |
| Temperature, K                               | 100.0(2)                                                                                 |
| Crystal system                               | Monoclinic                                                                               |
| Space group                                  | <i>C2/c</i>                                                                              |
| <i>a</i> , Å                                 | 17.7001(7)                                                                               |
| <i>b</i> , Å                                 | 14.9411(7)                                                                               |
| <i>c</i> , Å                                 | 22.5015(10)                                                                              |
| β, °                                         | 96.5309(16)                                                                              |
| <i>V</i> , Å <sup>3</sup>                    | 5930.1(4)                                                                                |
| <i>Z</i>                                     | 8                                                                                        |
| λ, Å                                         | 0.71073                                                                                  |
| <i>D</i> <sub>calc</sub> , Mg/m <sup>3</sup> | 1.301                                                                                    |
| μ, mm <sup>-1</sup>                          | 0.947                                                                                    |
| <i>F</i> (000)                               | 2360                                                                                     |
| Crystal size, mm <sup>3</sup>                | 0.360 × 0.220 × 0.140                                                                    |
| Reflections collected                        | 125143                                                                                   |
| Independent reflections                      | 6562 [R(int) = 0.0802]                                                                   |
| Completeness to theta = 25.000°              | 100.0 %                                                                                  |
| Absorption correction                        | Semi-empirical from equivalents                                                          |
| Refinement method                            | Full-matrix least-squares on <i>F</i> <sup>2</sup>                                       |
| Data/restraints/parameters                   | 6562/0/334                                                                               |
| Goodness of fit                              | 1.207                                                                                    |
| Final R indices [ <i>I</i> > 2σ( <i>I</i> )] | R <sub>1</sub> = 0.0654, wR <sub>2</sub> = 0.1414                                        |
| R indices (all data)                         | R <sub>1</sub> = 0.0786, wR <sub>2</sub> = 0.1477                                        |

$$R_1 = \sum ||F_0| - |F_c|| / \sum |F_0|; wR_2 = [\sum w(F_0^2 - F_c^2)^2 / \sum w(F_0^2)^2]^{1/2}$$

**Table S3.** Selected bond lengths [Å] and angles [°] for **1** and **2**.

---

|             |            |                   |            |
|-------------|------------|-------------------|------------|
| <b>1</b>    |            |                   |            |
| Cu(1)–N(4)  | 1.998(4)   | N(4)–Cu(1)–N(7)   | 175.06(15) |
| Cu(1)–N(7)  | 2.003(4)   | N(7)–Cu(1)–N(10)  | 94.03(14)  |
| Cu(1)–N(10) | 2.174(4)   | N(4)–Cu(1)–Cl(1)  | 89.31(11)  |
| Cu(1)–Cl(1) | 2.3131(13) | N(10)–Cu(1)–Cl(1) | 101.59(11) |
| Cu(1)–Cl(2) | 2.3291(12) | Cl(1)–Cu(1)–Cl(2) | 156.84(5)  |
| <b>2</b>    |            |                   |            |
| Mn(1)–O(1)  | 2.2229(15) | O(1)–Mn(1)–N(4)   | 92.52(6)   |
| Mn(1)–N(9)  | 2.2659(17) | N(4)–Mn(1)–N(7)   | 88.57(6)   |
| Mn(1)–Cl(2) | 2.4846(6)  | N(4)–Mn(1)–N(9)   | 173.37(6)  |
| Mn(1)–N(4)  | 2.2254(17) | N(7)–Mn(1)–Cl(2)  | 95.60(5)   |
| Mn(1)–N(7)  | 2.2676(17) | O(1)–Mn(1)–N(7)   | 174.90(6)  |

Symmetry transformations used to generate equivalent atoms: for **1**: #1  $-x + 1, y - 1, -z + 1/2$ , #2  $-x + 1, -y, -z + 1$ , #3  $-x + 1, y + 1, -z + 1/2$ ; for **2**: #1  $-x + 1, y - 1, -z + 1/2$ , #2  $x, -y + 1, z + 1/2$ , #3  $-x + 1, y + 1, -z + 1/2$ , #4  $x, -y + 1, z - 1/2$

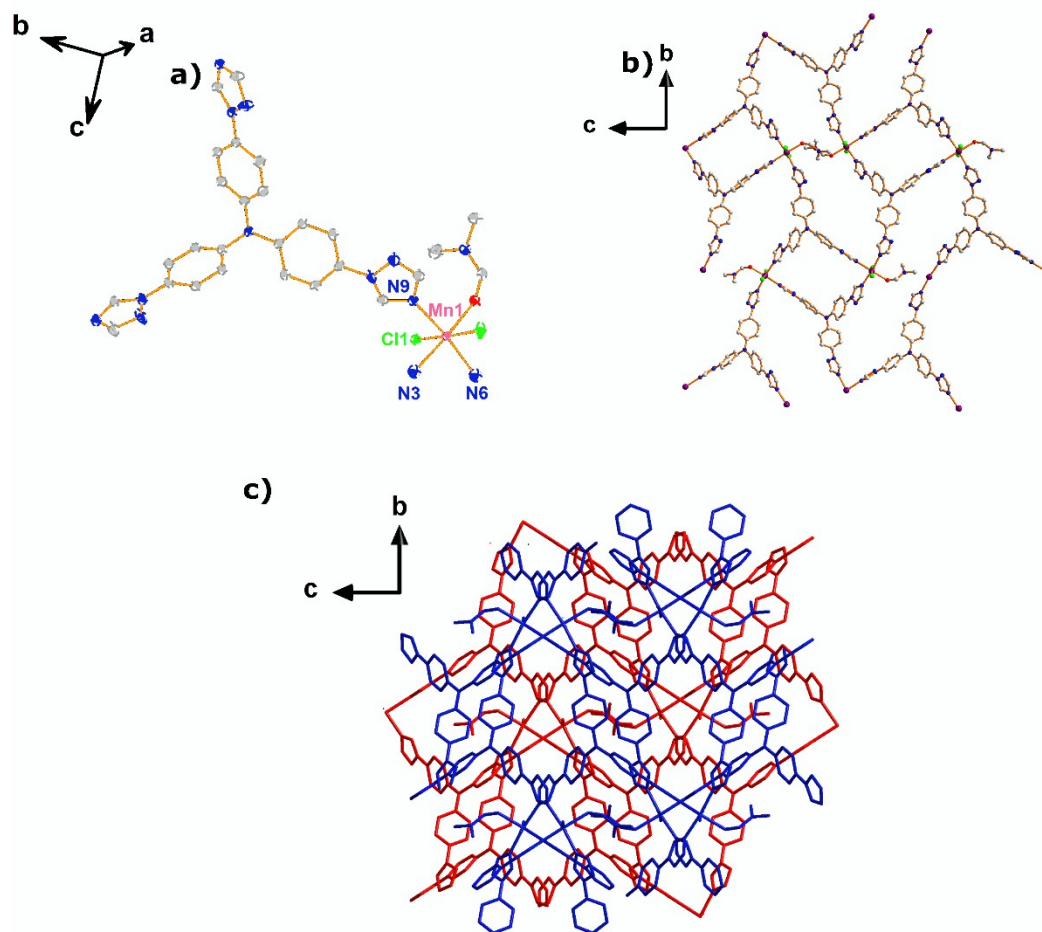

Figure S1. a) Coordination environments of **1**, 50% probability ellipsoids, b) two-dimension view along the *b* axis, c) 2-fold interpenetration of **1** view along the *b* axis.

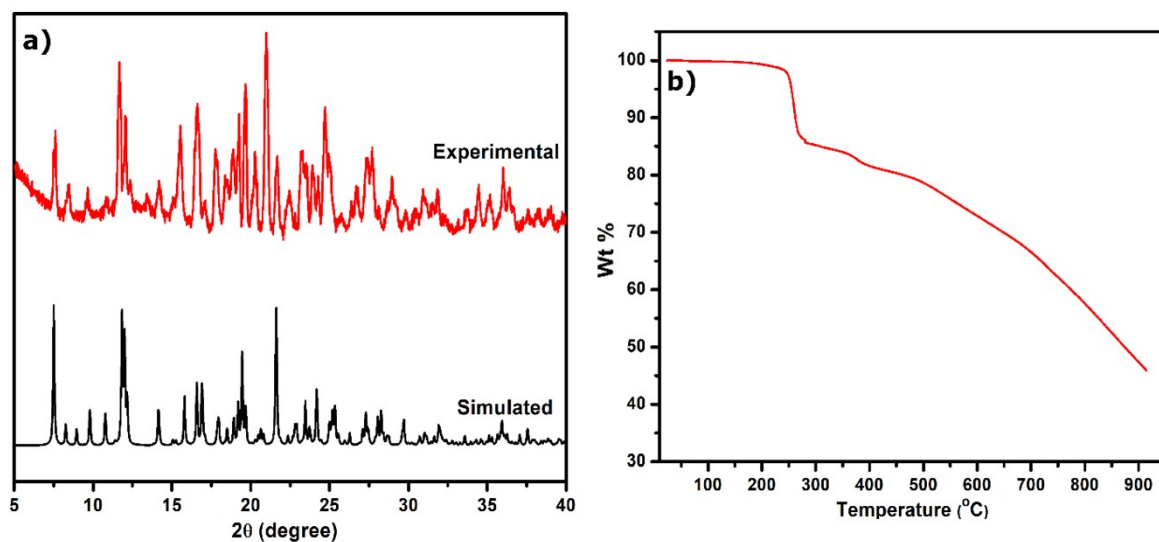

Figure S2. (a) Simulated and experimental PXRD patterns of **1**, (b) thermal gravimetric analysis (TGA) of **1** over the temperature range 30–900 °C.

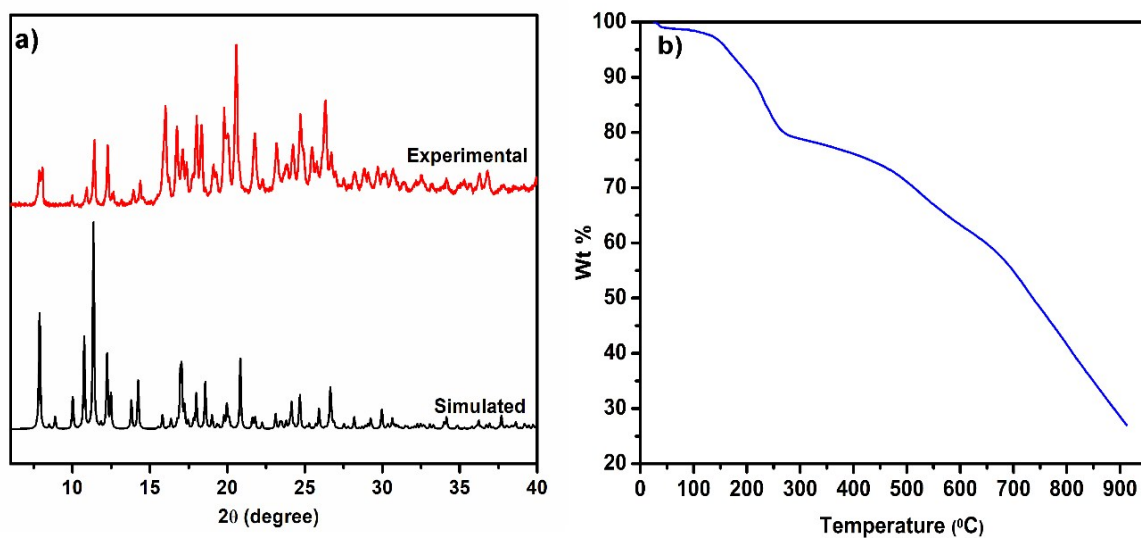

Figure S3. a) Simulated and experimental PXRD patterns of **2**, b) thermal gravimetric analysis (TGA) of **2** over the range 30–900 °C.



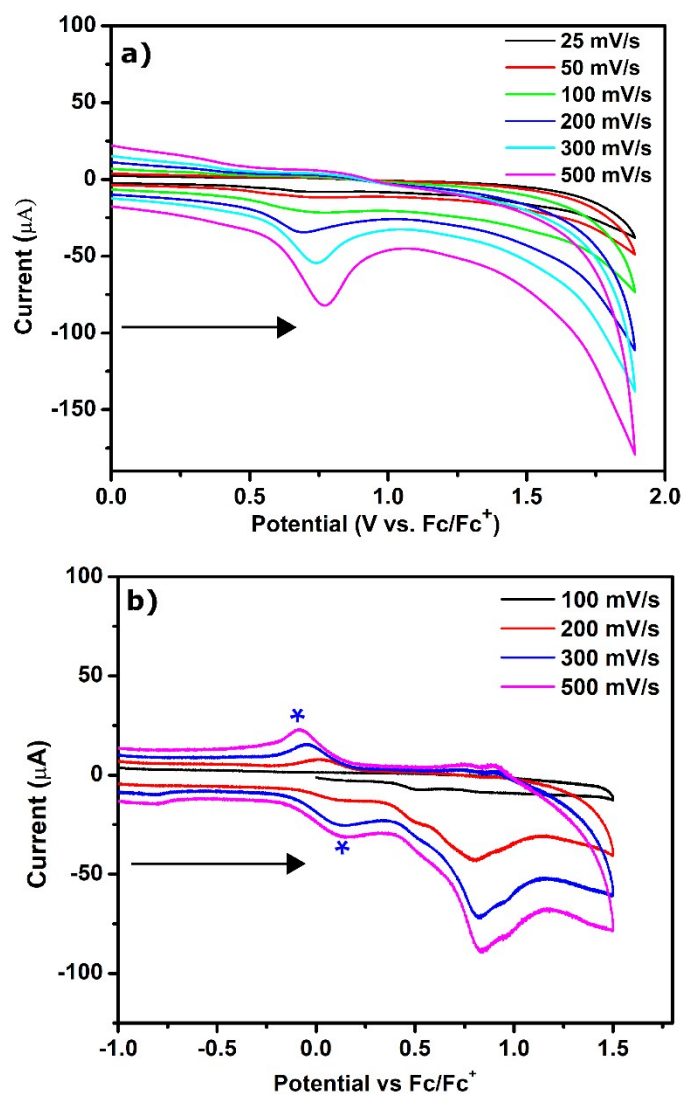

Figure S4. Solid state electrochemistry of **1** (a) and **2** (b) frameworks in 0.1 M  $[(n\text{-C}_4\text{H}_9)_4\text{N}]\text{PF}_6/\text{propionitrile}$  as the electrolyte over the scan ranges of 25 to 1000 mV/s. The asterisks in Figure 4b represent the added  $\text{Fc}/\text{Fc}^+$ .

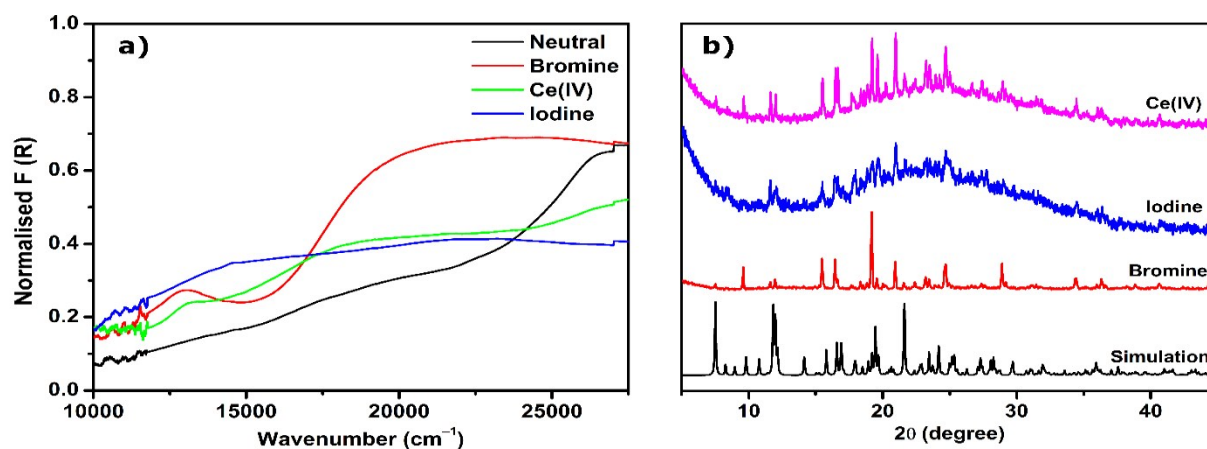

Figure S5. (a) Superimposed UV/Vis/NIR spectra for **1** (neutral) and its oxidised analogues over the range of 10000–45000 cm<sup>-1</sup>, (b) PXRD patterns of the oxidised analogues.

#### Reference

1. F. Neese, *WIREs Comput. Mol. Sci.* 2018, 8:e1327. doi: 10.1002/wcms.1327
